# Supplementary material
Source: PubMed Central journal article supplement (PMC3220507)
Supplement: supp_M111.289983_jbc.M111.289983-1.pdf [file supp_M111.289983_jbc.M111.289983-1.pdf]

## SUPPLEMENTAL DATA

### FIGURE LEGENDS

**Figure S1. SDS-PAGE of variants of *HsmtSSB*.** Near-homogeneous fractions (~1  $\mu\text{g}$ ) of recombinant *HsmtSSB*wt (*lane 2*), loop12 (*lane 3*), loop23 (*lane 4*),  $\alpha 1$  (*lane 5*), loop45-1 (*lane 6*), and loop45-2 (*lane 7*) were subjected to SDS-PAGE in a 17% gel, followed by Coomassie blue staining. *E. coli* SSB (~1  $\mu\text{g}$ ; USB® Molecular Biology Reagents and Biochemicals) is shown in *lane 1* for comparison. The smear below the *HsmtSSB* protein bands is an artifact in the SDS-PAGE analysis that has been observed previously, and is not apparent each time the same sample is analyzed (4,5). The sizes of molecular mass markers (BenchMark™ Pre-Stained Protein Ladder, Invitrogen™) are indicated in kDa at *left*.

**Figure S2. Variants of *HsmtSSB* form tetramers in solution.** Recombinant *HsmtSSB*wt and *HsmtSSB* variants were sedimented in preformed 12-30% glycerol gradients as described (4), and fractions were subjected to SDS-PAGE in a 17% gel, followed by Coomassie blue staining. Standard protein markers (*inset panel*) used were: bovine serum albumin (BSA, 4.85 *S*), carbonic anhydrase (CA, 3.23 *S*), and lysozyme (LYS, 1.91 *S*). The *S* value determined for all *HsmtSSB* proteins was 4.3.

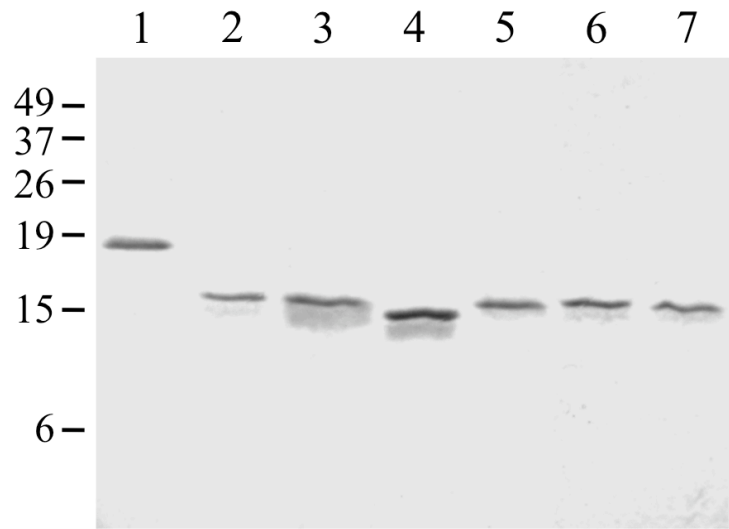

Figure S1

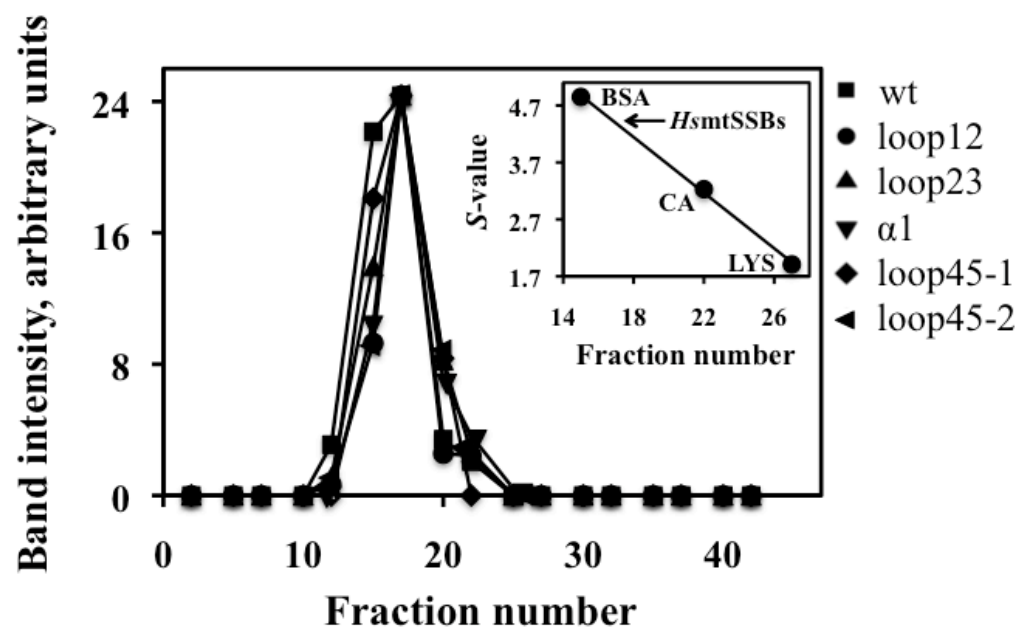

Figure S2
